# Supplementary material
Source: MDPI journal article supplement (https://www.mdpi.com/2073-4352/13/2/362)
Supplement: s1 [file s1]

## Supplementary materials

### Structural and spectroscopic effects of $\text{Li}^+$ substitution for $\text{Na}^+$ in $\text{Li}_x\text{Na}_{1-x}$

### $\text{CaLa}_{0.5}\text{Er}_{0.05}\text{Yb}_{0.45}(\text{MoO}_4)_3$ scheelite-type upconversion phosphors

Chang Sung Lim<sup>1</sup>, Aleksandr Aleksandrovsky<sup>2,3</sup>, Maxim Molokeyev<sup>4,5,6</sup>, Aleksandr Oreshonkov<sup>7,8</sup>,

Victor Atuchin<sup>9,10,11,12</sup>

<sup>1</sup>Department of Aerospace Advanced Materials and Chemical Engineering, Hanseo University,

Seosan 31962, Korea

<sup>2</sup>Laboratory of Coherent Optics, Kirensky Institute of Physics Federal Research Center KSC SB RAS,

Krasnoyarsk 660036, Russia

<sup>3</sup>Institute of Nanotechnology, Spectroscopy and Quantum Chemistry, Siberian Federal University,

Krasnoyarsk 660041, Russia

<sup>4</sup>Laboratory of Crystal Physics, Kirensky Institute of Physics, Federal Research Center KSC SB RAS,

Krasnoyarsk 660036, Russia

<sup>5</sup>Institute of Engineering Physics and Radioelectronics, Siberian Federal University, Krasnoyarsk

660041, Russia

<sup>6</sup>Department of Physics, Far Eastern State Transport University, Khabarovsk 680021, Russia

<sup>7</sup>Laboratory of Molecular Spectroscopy, Kirensky Institute of Physics, Federal Research Center KSC

SB RAS, Krasnoyarsk 660036, Russia

<sup>8</sup>School of Engineering and Construction, Siberian Federal University, Krasnoyarsk 660041, Russia

<sup>9</sup>Laboratory of Optical Materials and Structures, Institute of Semiconductor Physics, SB RAS,

Novosibirsk 630090, Russia

<sup>10</sup>Research and Development Department, Kemerovo State University, Kemerovo 650000, Russia

<sup>11</sup>Department of Industrial Machinery Design, Novosibirsk State Technical University, Novosibirsk  
630073, Russia

<sup>12</sup>R&D Center “Advanced Electronic Technologies”, Tomsk State University, Tomsk 634034, Russia

**Table S1.** Fractional atomic coordinates and isotropic displacement parameters ( $\text{\AA}^2$ ) of the  $(\text{Na}_{1-x}\text{Li}_x)\text{Ca}(\text{La}_{0.5}\text{Er}_{0.05}\text{Yb}_{0.45})(\text{MoO}_4)_3$  samples

|                                                            | $x$       | $y$       | $z$        | $B_{\text{iso}}$ | Occ.  |
|------------------------------------------------------------|-----------|-----------|------------|------------------|-------|
| NCLM                                                       |           |           |            |                  |       |
| Na                                                         | 0         | 1/4       | 5/8        | 0.3 (2)          | 1/3   |
| Ca                                                         | 0         | 1/4       | 5/8        | 0.3 (2)          | 1/3   |
| La                                                         | 0         | 1/4       | 5/8        | 0.3 (2)          | 1/6   |
| Er                                                         | 0         | 1/4       | 5/8        | 0.3 (2)          | 1/60  |
| Yb                                                         | 0         | 1/4       | 5/8        | 0.3 (2)          | 0.15  |
| Mo                                                         | 0         | 1/4       | 5/8        | 0.5 (2)          | 1     |
| O                                                          | 0.240 (2) | 0.103 (2) | 0.0429 (7) | 0.7 (3)          | 1     |
| $\text{Na}_{0.95}\text{Li}_{0.05}\text{CLM:0.05Er,0.45Yb}$ |           |           |            |                  |       |
| Na                                                         | 0         | 1/4       | 5/8        | 0.7 (2)          | 19/60 |
| Li                                                         | 0         | 1/4       | 5/8        | 0.7 (2)          | 1/60  |
| Ca                                                         | 0         | 1/4       | 5/8        | 0.7 (2)          | 1/3   |
| La                                                         | 0         | 1/4       | 5/8        | 0.7 (2)          | 1/6   |
| Er                                                         | 0         | 1/4       | 5/8        | 0.7 (2)          | 1/60  |
| Yb                                                         | 0         | 1/4       | 5/8        | 0.7 (2)          | 0.15  |
| Mo                                                         | 0         | 1/4       | 1/8        | 0.5 (2)          | 1     |
| O                                                          | 0.239 (2) | 0.102 (1) | 0.0432 (6) | 0.5 (3)          | 1     |
| $\text{Na}_{0.9}\text{Li}_{0.1}\text{CLM:0.05Er,0.45Yb}$   |           |           |            |                  |       |
| Na                                                         | 0         | 1/4       | 5/8        | 1.4 (2)          | 3/10  |
| Li                                                         | 0         | 1/4       | 5/8        | 1.4 (2)          | 1/30  |
| Ca                                                         | 0         | 1/4       | 5/8        | 1.4 (2)          | 1/3   |
| La                                                         | 0         | 1/4       | 5/8        | 1.4 (2)          | 1/6   |
| Er                                                         | 0         | 1/4       | 5/8        | 1.4 (2)          | 1/60  |
| Yb                                                         | 0         | 1/4       | 5/8        | 1.4 (2)          | 0.15  |
| Mo                                                         | 0         | 1/4       | 1/8        | 1.3 (2)          | 1     |
| O                                                          | 0.235 (2) | 0.107 (1) | 0.0453 (7) | 1.2 (3)          | 1     |
| $\text{Na}_{0.8}\text{Li}_{0.2}\text{CLM:0.05Er,0.45Yb}$   |           |           |            |                  |       |
| Na                                                         | 0         | 1/4       | 5/8        | 0.5 (2)          | 8/30  |
| Li                                                         | 0         | 1/4       | 5/8        | 0.5 (2)          | 2/30  |
| Ca                                                         | 0         | 1/4       | 5/8        | 0.5 (2)          | 1/3   |
| La                                                         | 0         | 1/4       | 5/8        | 0.5 (2)          | 1/6   |

|                                                       |           |           |            |         |      |
|-------------------------------------------------------|-----------|-----------|------------|---------|------|
| Er                                                    | 0         | 1/4       | 5/8        | 0.5 (2) | 1/60 |
| Yb                                                    | 0         | 1/4       | 5/8        | 0.5 (2) | 0.15 |
| Mo                                                    | 0         | 1/4       | 1/8        | 0.6 (2) | 1    |
| O                                                     | 0.245 (2) | 0.096 (1) | 0.0395 (6) | 0.5 (3) | 1    |
| Na <sub>0.7</sub> Li <sub>0.3</sub> CLM:0.05Er,0.45Yb |           |           |            |         |      |
| Na                                                    | 0         | 1/4       | 5/8        | 1.0 (2) | 7/30 |
| Li                                                    | 0         | 1/4       | 5/8        | 1.0 (2) | 1/10 |
| Ca                                                    | 0         | 1/4       | 5/8        | 1.0 (2) | 1/3  |
| La                                                    | 0         | 1/4       | 5/8        | 1.0 (2) | 1/6  |
| Er                                                    | 0         | 1/4       | 5/8        | 1.0 (2) | 1/60 |
| Yb                                                    | 0         | 1/4       | 5/8        | 1.0 (2) | 0.15 |
| Mo                                                    | 0         | 1/4       | 1/8        | 0.8 (2) | 1    |
| O                                                     | 0.234 (2) | 0.103 (1) | 0.0415 (6) | 1.1 (3) | 1    |

**Table S2.** Main bond lengths (Å) of the (Na<sub>1-x</sub>Li<sub>x</sub>)Ca(La<sub>0.5</sub>Er<sub>0.05</sub>Yb<sub>0.45</sub>)(MoO<sub>4</sub>)<sub>3</sub> samples

| NCLM                                                    |           |      |           |
|---------------------------------------------------------|-----------|------|-----------|
| (Na/Ca/La)—O <sup>i</sup>                               | 2.48 (1)  | Mo—O | 1.75 (1)  |
| (Na/Ca/La)—O <sup>ii</sup>                              | 2.48 (1)  |      |           |
| Na <sub>0.95</sub> Li <sub>0.05</sub> CLM:0.05Er,0.45Yb |           |      |           |
| (Na//Li/Ca/La/Er/Yb)—O <sup>i</sup>                     | 2.483 (9) | Mo—O | 1.746 (8) |
| (Na//Li/Ca/La/Er/Yb)—O <sup>ii</sup>                    | 2.490 (8) |      |           |
| Na <sub>0.9</sub> Li <sub>0.1</sub> CLM:0.05Er,0.45Yb   |           |      |           |
| (Na//Li/Ca/La/Er/Yb)—O <sup>i</sup>                     | 2.50 (1)  | Mo—O | 1.71 (1)  |
| (Na//Li/Ca/La/Er/Yb)—O <sup>ii</sup>                    | 2.511 (9) |      |           |
| Na <sub>0.8</sub> Li <sub>0.2</sub> CLM:0.05Er,0.45Yb   |           |      |           |
| (Na//Li/Ca/La/Er/Yb)—O <sup>i</sup>                     | 2.45 (1)  | Mo—O | 1.824 (9) |
| (Na//Li/Ca/La/Er/Yb)—O <sup>ii</sup>                    | 2.431 (9) |      |           |
| Na <sub>0.7</sub> Li <sub>0.3</sub> CLM:0.05Er,0.45Yb   |           |      |           |
| (Na//Li/Ca/La/Er/Yb)—O <sup>i</sup>                     | 2.505 (9) | Mo—O | 1.735 (9) |
| (Na//Li/Ca/La/Er/Yb)—O <sup>ii</sup>                    | 2.482 (8) |      |           |

Symmetry codes: (i) -x+1/2, -y, z+1/2; (ii) -x+1/2, -y+1/2, -z+1/2.

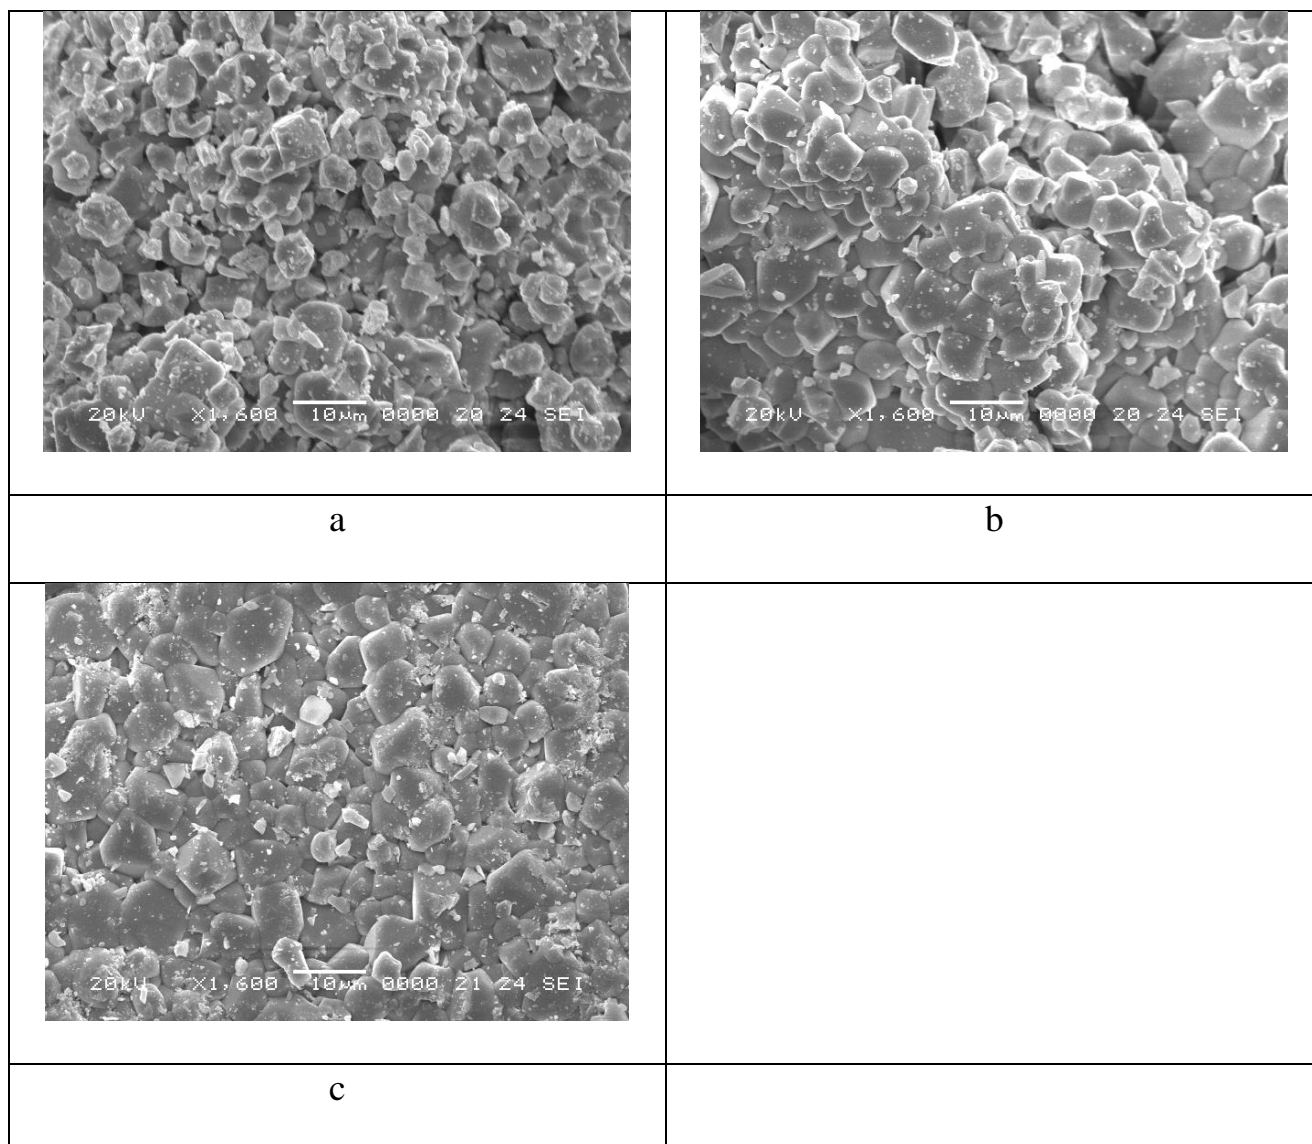

**Figure S1.** SEM patterns recorded for (a) LiNCLM:EY-0.05, (b) LiNCLM:EY-0.1 and (c) LiNCLM:EY-0.2.

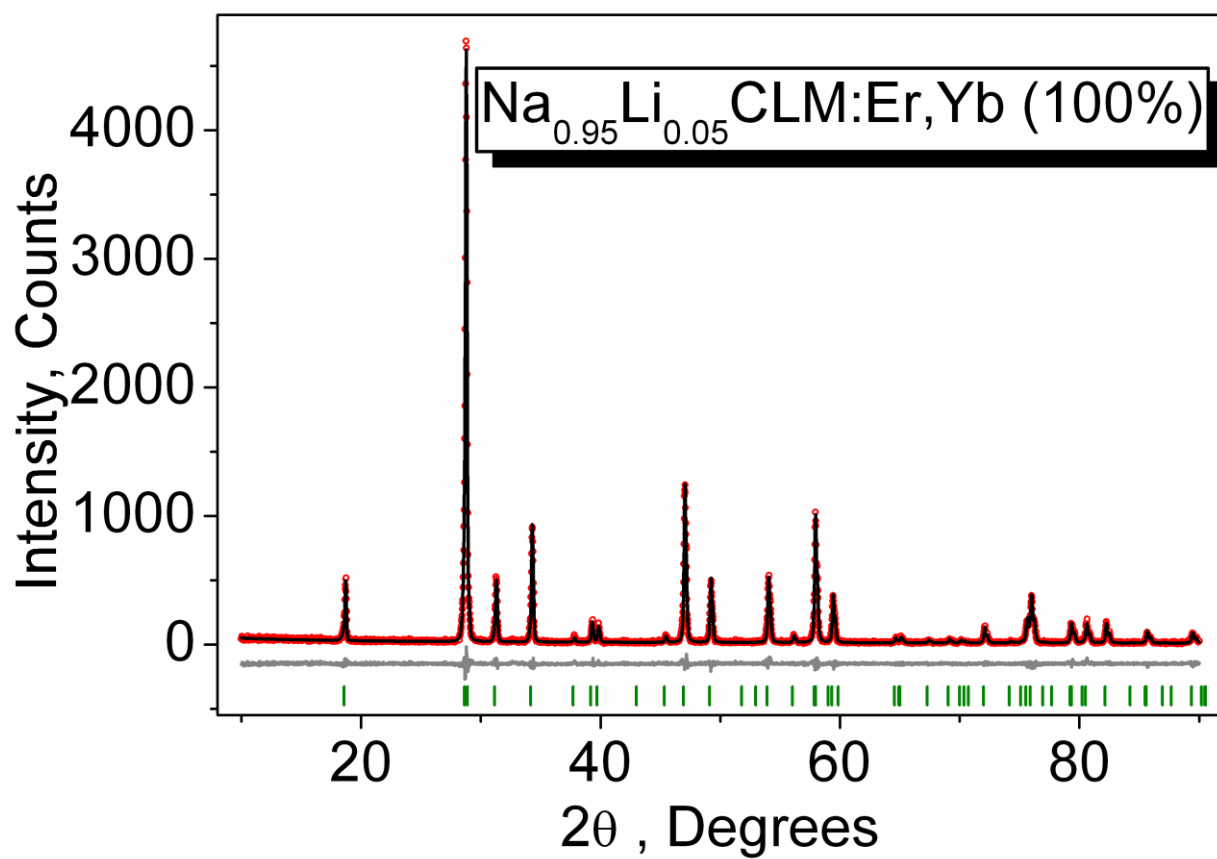

a

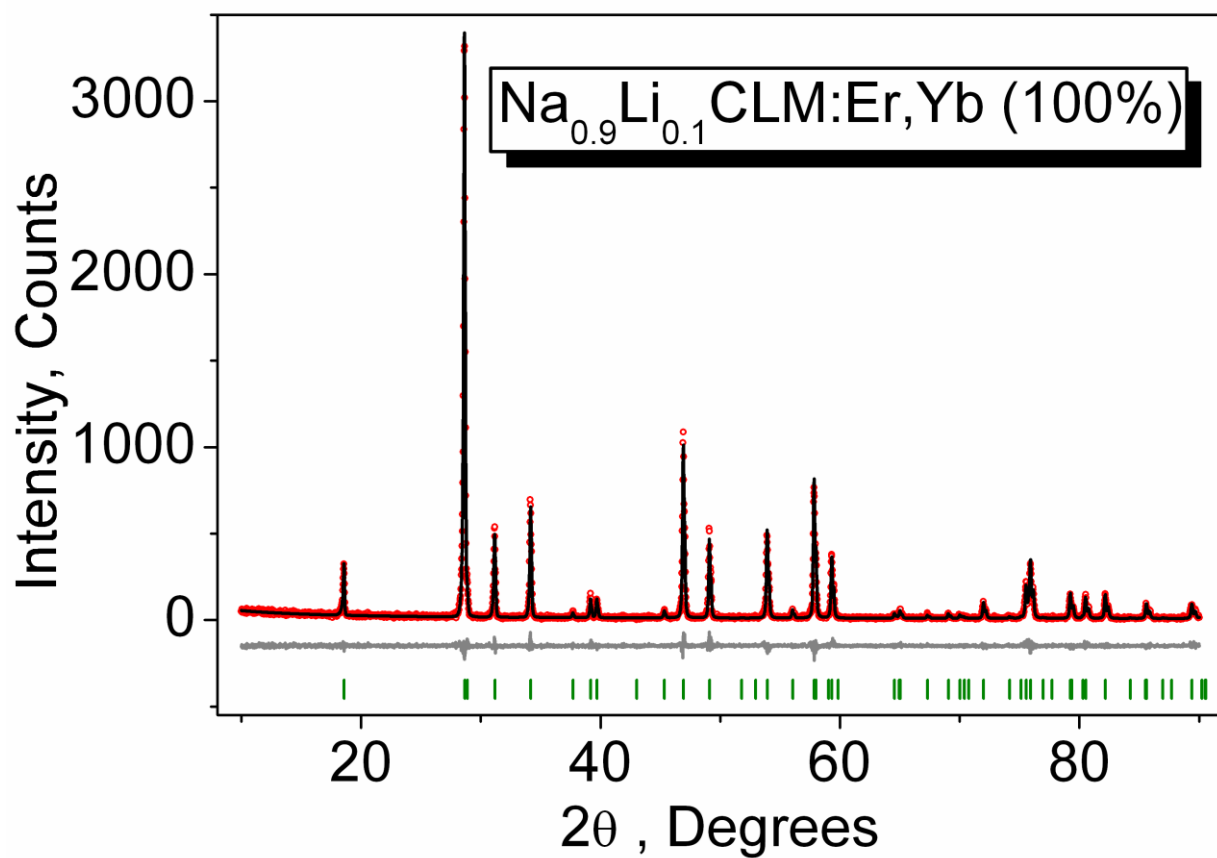

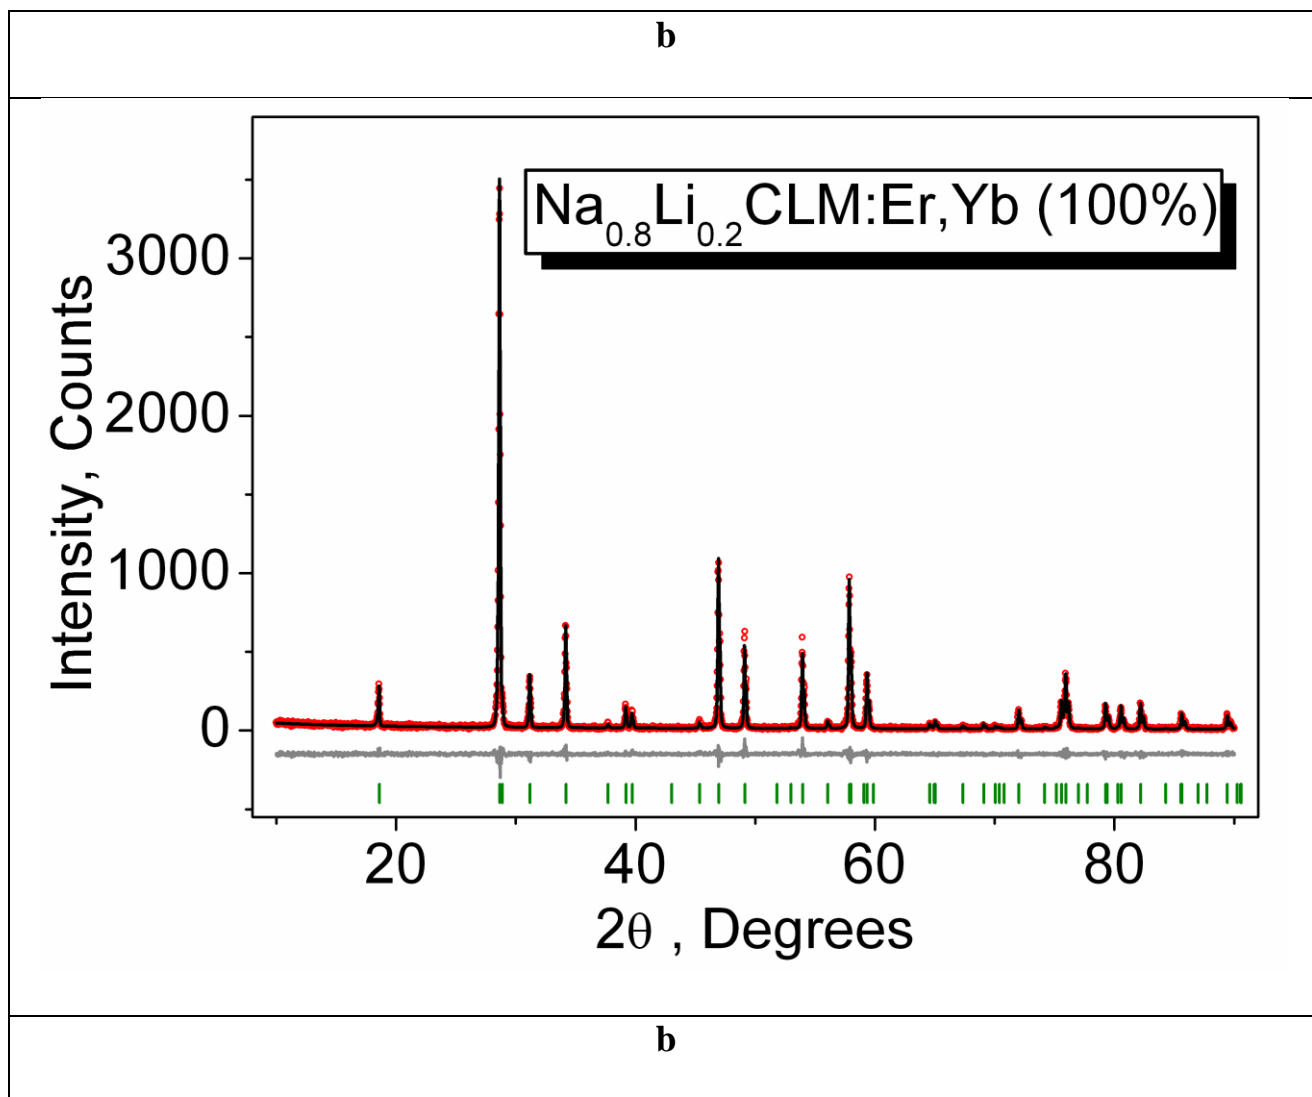

**Figure S2.** Rietveld difference patterns obtained for (a) LiNCLM:EY-0.05, (b) LiNCLM:EY-0.1 and (c) LiNCLM:EY-0.2. Measured points are given in red, calculated profile – in black, difference profile – in grey, and calculated peak positions are shown by segments in green.
